# Supplementary material
Source: PubMed Central journal article supplement (PMC4791608)
Supplement: aasm.39.4.743s1.pdf [file aasm.39.4.743s1.pdf]

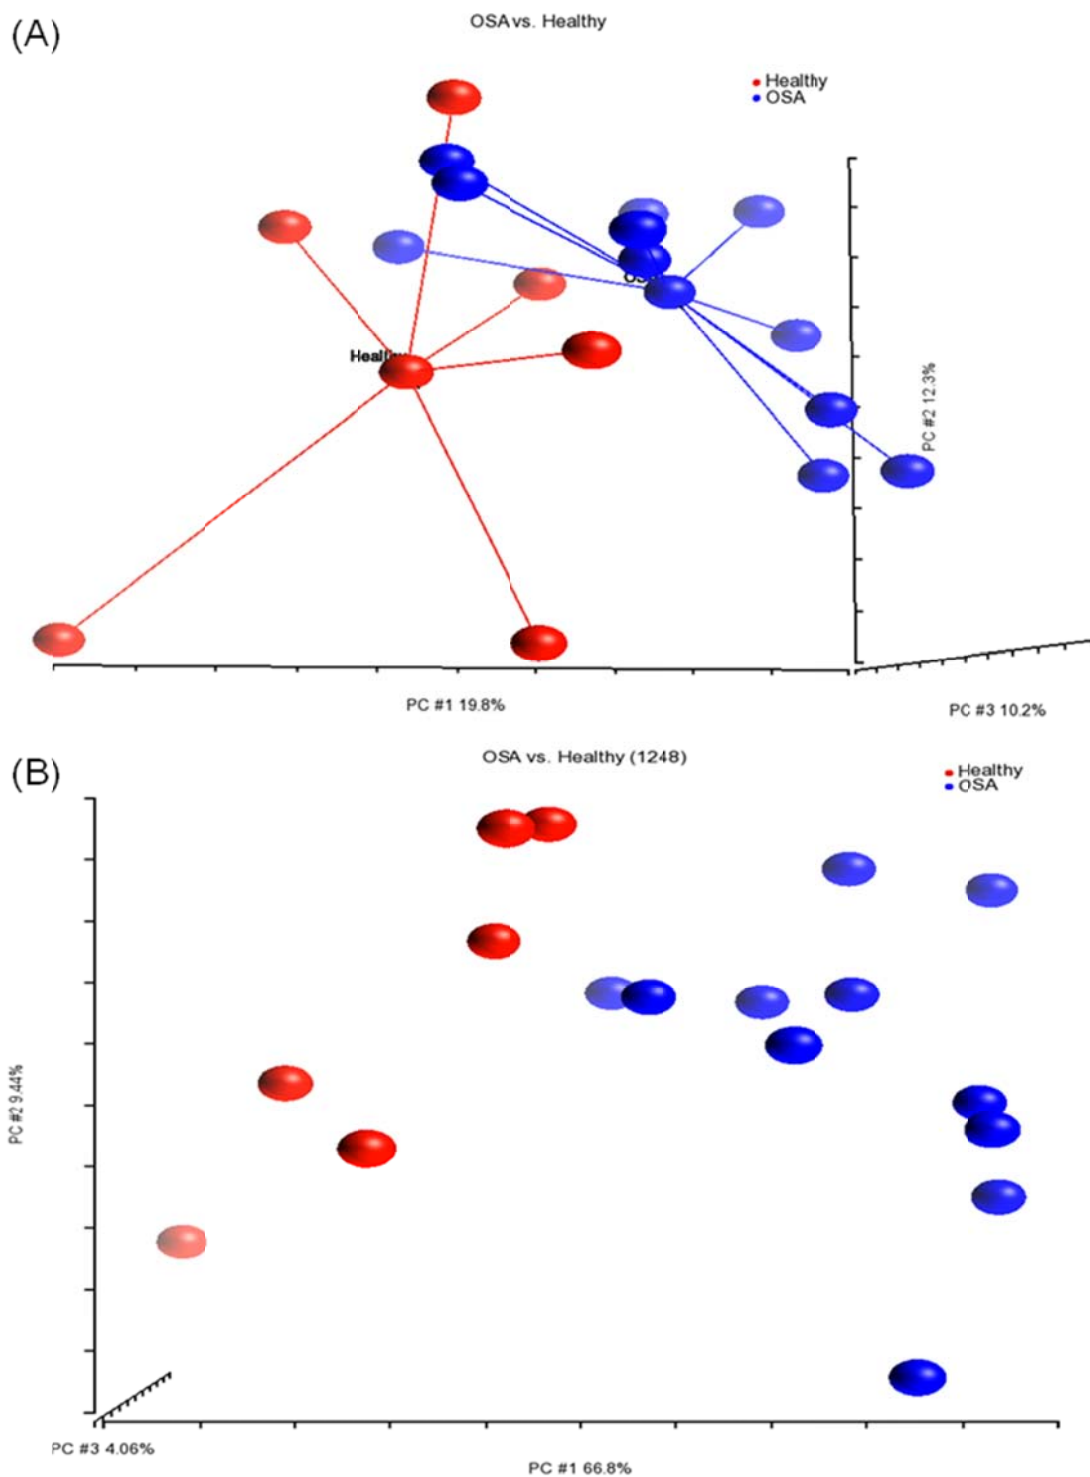

**Figure S1.** Principal component analysis plots showing (A) total data in the microarray experiment, and (B) filtered data after three outliers were removed.

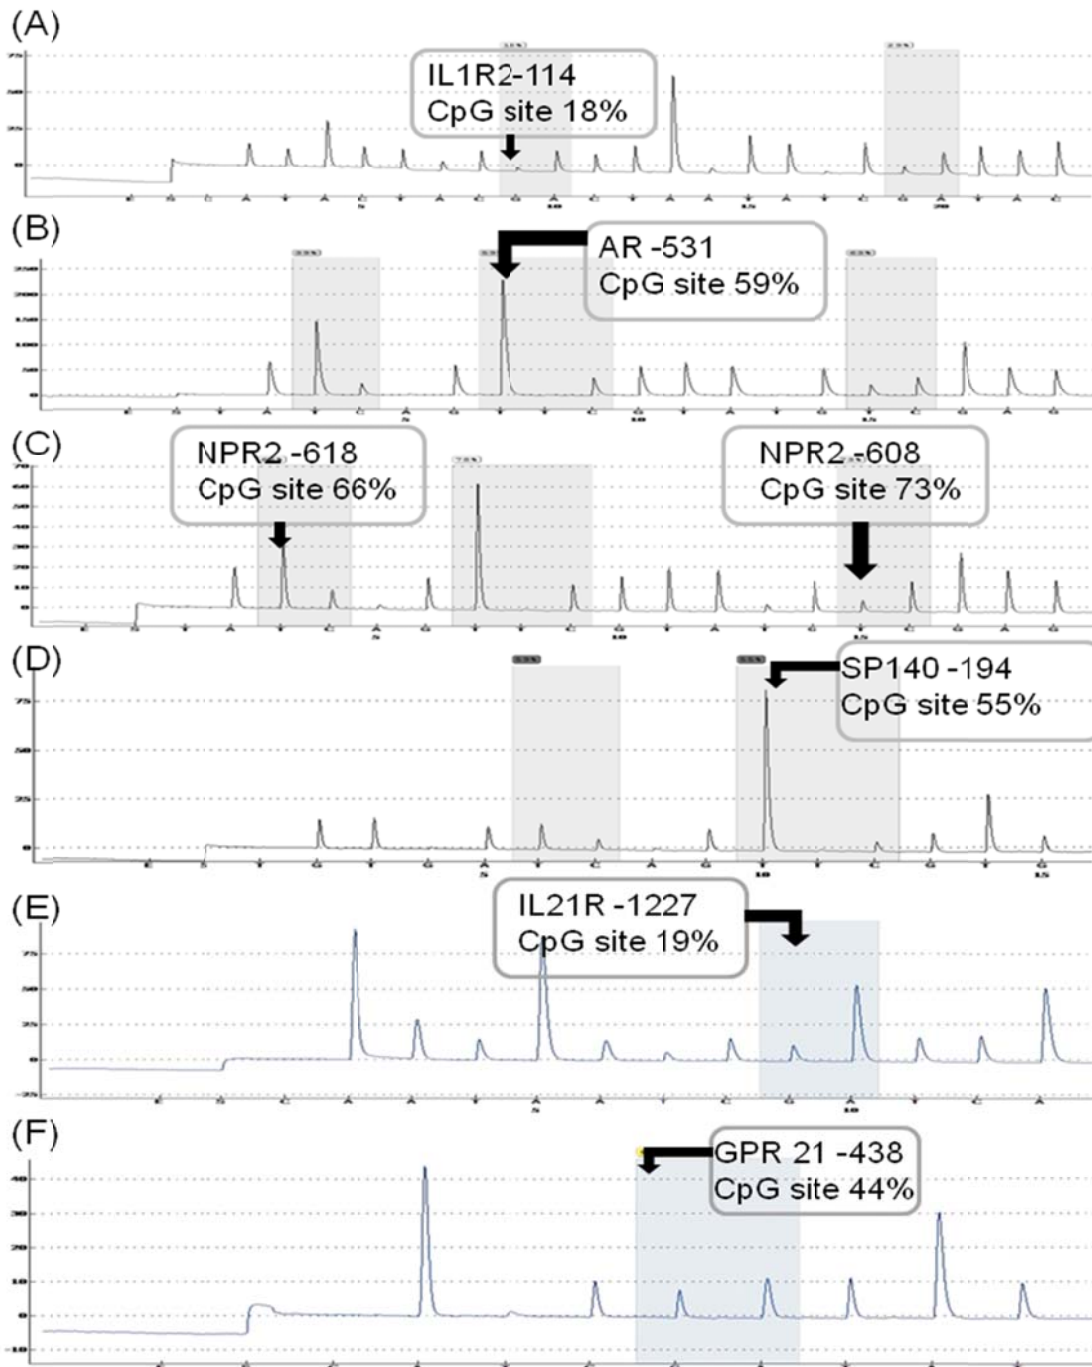

**Figure S2.** Representative programs showing the methylation at (A) -114 CpG site of the *IL1R2* promoter, (B) -531 CpG site of the *AR* promoter, (C) -608 and -618 CpG sites of the *NPR2* promoter, (D) -194 CpG site of the *Sp140* promoter region, (E) -1227 CpG site of the *IL21R* promoter region, and (F) -438 CpG site of the *GPR21* promoter region in a patient with OSA.

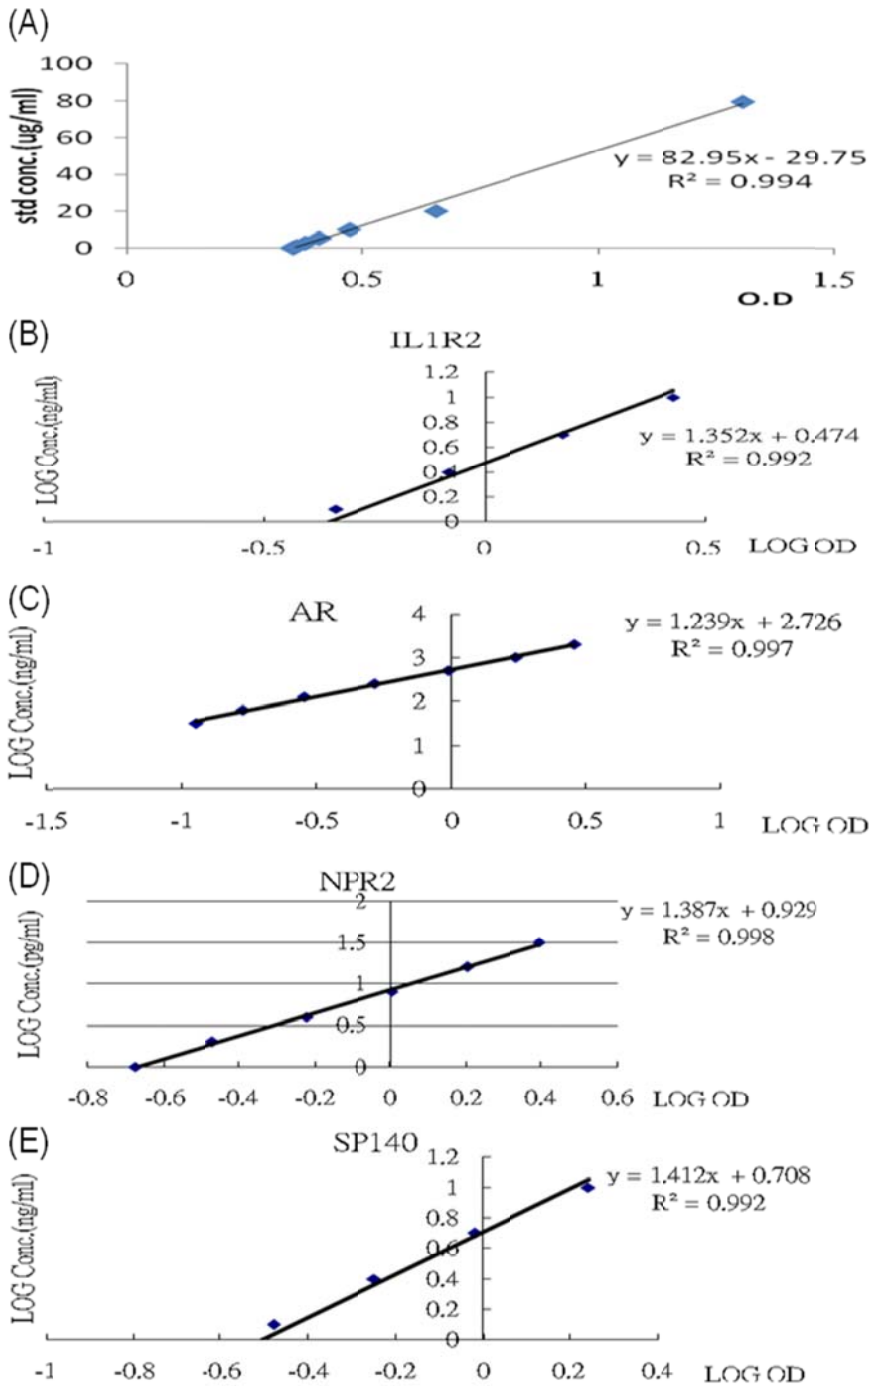

**Figure S3.** Standard curves for measuring total and specific protein levels of the peripheral blood mononuclear cells by the spectrophotometer and enzyme-linked immunosorbent assay methods. (A) Bovine serum albumin concentrations (Y-coordinate) from 0 to 80  $\mu\text{g/ml}$  were plotted against oxygen desaturation (OD) values at 595 nm (X-coordinate). The formulation was then used for the estimation of total protein concentrations of the peripheral blood mononuclear cell samples. (B) IL1R2, (C) AR, (D) NPR2, and (E) SP140 protein concentrations plotted against OD values after their logarithmic transformation.

**Table S1.** DNA Methylation Levels of the 20 CpG Sites Over the 16 Candidate Gene Promoter Regions in the Discovery Cohort

| Column ID               | Gene symbol    | Distance to TSS | Healthy subjects<br>N = 6 |              |                    | Patients with<br>OSA<br>N = 15 |              |                    |
|-------------------------|----------------|-----------------|---------------------------|--------------|--------------------|--------------------------------|--------------|--------------------|
|                         |                |                 | Mean,<br>%                | Median,<br>% | $\beta^b$<br>value | Mean,<br>%                     | Median,<br>% | $\beta^b$<br>value |
| cg02656594 <sup>a</sup> | <i>IL21R</i>   | 1227            | 20.4                      | 22           | 62.5               | 17.9                           | 16           | 46.2               |
| cg05564251 <sup>a</sup> | <i>SP140</i>   | 194             | 51.1                      | 46           | 48.7               | 51.9                           | 51           | 59.9               |
| cg10266490              | <i>ACOT11</i>  | 192             | 41                        | 35           | 34.4               | 40.2                           | 40           | 19.2               |
| cg02519218              | <i>CHFR</i>    | 490             | 61.6                      | 59           | 74.7               | 58.5                           | 60           | 86.3               |
| cg19740969              | <i>CXCL9</i>   | 949             | 77.9                      | 76           | 70.3               | 65.7                           | 62           | 86.6               |
| cg22442090              | <i>GIMAP5</i>  | 374             | 36.6                      | 37           | 50.0               | 35                             | 36           | 64.7               |
| cg06796611              | <i>IL24</i>    | 45              | 40.7                      | 42           | 39.1               | 38.7                           | 40           | 53.6               |
| cg12876594 <sup>a</sup> | <i>NPR2</i>    | 608             | 30                        | 30           | 73.5               | 25.4                           | 26           | 55.9               |
| cg12876594 <sup>a</sup> | <i>NPR2</i>    | 618             | 58.7                      | 57           | 70.7               | 55.6                           | 55           | 56.3               |
| cg05019001 <sup>a</sup> | <i>AR</i>      | 531             | 34.3                      | 33           | 9.2                | 35.9                           | 35           | 20.8               |
| cg17142183 <sup>a</sup> | <i>IL1R2</i>   | 114             | 21.8                      | 21.5         | 80.2               | 18.1                           | 18           | 72.9               |
| cg06501084              | <i>KCNH5</i>   | 389             | 85.2                      | 85           | 54.4               | 83.2                           | 85.5         | 65.1               |
| cg00995520              | <i>KCNA3</i>   | 627             | 41.2                      | 39.5         | 62.0               | 50.5                           | 47           | 46.0               |
| cg03483626              | <i>KCNA3</i>   | 621             | 53.5                      | 60.5         | 42.9               | 66.9                           | 67.5         | 39.6               |
| cg22825487              | <i>VNN3</i>    | 720             | 56.3                      | 60.5         | 66.9               | 61.8                           | 69           | 54.7               |
| cg02218214              | <i>ANGPTL3</i> | 698             | 50                        | 53           | 67.3               | 43.6                           | 41           | 75.8               |
| cg21409833              | <i>ANGPTL3</i> | 463             | 96.2                      | 96.5         | 75.5               | 92.8                           | 96           | 83.5               |
| cg13578652              | <i>UBASH3A</i> | 156             | 67.5                      | 57           | 38.3               | 69.3                           | 61           | 45.3               |
| cg00134539              | <i>UBASH3A</i> | 52              | 53.3                      | 53           | 36.5               | 45.2                           | 45           | 50.0               |
| cg04784315 <sup>a</sup> | <i>GPR21</i>   | 438             | 33.5                      | 37.5         | 62.7               | 28.3                           | 28           | 49.9               |

<sup>a</sup>The changes in both the mean and median values of DNA methylation levels measured by the pyrosequencing method are in the same direction as the microarray results, and the difference in  $\beta$  value is  $\geq 10\%$ .

<sup>b</sup>Calculated from the microarray results, as described in the Methods section.

OSA = obstructive sleep apnea; TSS = transcription start site.

**Table S2.** Primer sequences used for polymerase chain reaction and pyrosequencing of the six selected genes verified in the validation cohort

| Gene         | Primer                          | Sequences                      |
|--------------|---------------------------------|--------------------------------|
| <i>IL1R2</i> | Biotinylated forward PCR primer | TAATGGGGTTATAGTTGGGTAAA        |
|              | Reverse PCR primer              | CCCCCAAACACTACAATACTAAATCTAAA  |
|              | Forward sequencing primer       | CATAAATTTCCCTATTTTTCT          |
| <i>AR</i>    | Forward PCR primer              | TTGAGGGTTTTTAGAGTAAATGGTATA    |
|              | Biotinylated reverse PCR primer | TACCTACTCCTAACTACCAAAAATTCTT   |
|              | Forward sequencing primer       | TTTTTAGAGTAAATGGTATAATGT       |
| <i>NPR2</i>  | Biotinylated forward PCR primer | GAGGGAGGAGGAGAGGTA             |
|              | Reverse PCR primer              | ACAAAAAAAACAAAAATAAATCTCCCTAT  |
|              | Reverse sequencing primer       | AAACTCCTACTTAACTAA             |
| <i>GPR21</i> | Biotinylated forward PCR primer | GGTTTGTATTAGTATTGATAGATATATTGT |
|              | Reverse PCR primer              | CCATAATATCCAAATTTACCCCAATAA    |
|              | Reverse sequencing primer       | AACCAAATCAAAAAATACAC           |
| <i>SP140</i> | Forward PCR primer              | TAGGGGTAGATGGTAAGTGGA          |
|              | Biotinylated reverse PCR primer | ACAACCTCCAATCCAACCATTTACA      |
|              | Forward sequencing primer       | GAGATAGTAATTTTAATTTTAGGTG      |
| <i>IL21R</i> | Biotinylated forward PCR primer | AATGAGTTAGTAGGGAGAGTTATAAAT    |
|              | Reverse PCR primer              | CCTACATAATCTCACTTTATCCCACAAAAT |
|              | Reverse sequencing primer       | ACAAATAAAAAAACTAAAACCCA        |

PCR = polymerase chain reaction.

**Table S3.** Top Differentially Methylated Loci in the Comparison Between Patients With OSA With and Without Hypertension (Comparison II)

|                 | Column ID  | Gene symbol     | Chromosome | P value  | q value  | Difference in $\beta$ value |
|-----------------|------------|-----------------|------------|----------|----------|-----------------------------|
| Hypermethylated | cg10995925 | <i>LTA</i>      | 6          | 0.005905 | 0.473535 | 0.1985                      |
|                 | cg10466917 | <i>TRY1</i>     | 7          | 0.009324 | 0.473535 | 0.1513                      |
|                 | cg08843314 | <i>CXCR3</i>    |            | 0.00373  | 0.473535 | 0.14915                     |
|                 | cg22442090 | <i>GIMAP5</i>   | 7          | 0.009324 | 0.473535 | 0.13627                     |
|                 | cg24352688 | <i>OFD1</i>     |            | 0.009324 | 0.473535 | 0.13422                     |
|                 | cg04183425 | <i>ASF1A</i>    | 6          | 0.005905 | 0.473535 | 0.13095                     |
|                 | cg23276695 | <i>CNR1</i>     | 6          | 0.00373  | 0.473535 | 0.12856                     |
|                 | cg22268164 | <i>TRHR</i>     | 8          | 0.009324 | 0.473535 | 0.12566                     |
|                 | cg12513379 | <i>OR10H2</i>   | 19         | 0.005905 | 0.473535 | 0.12333                     |
|                 | cg12682367 | <i>FLJ46358</i> | 13         | 0.009324 | 0.473535 | 0.12038                     |
|                 | cg12927617 | <i>ORM1</i>     | 9          | 0.009324 | 0.473535 | 0.11887                     |
|                 | cg05564251 | <i>SP140</i>    | 2          | 0.009324 | 0.473535 | 0.11775                     |
|                 | cg27622610 | <i>ORIG1</i>    | 17         | 0.002176 | 0.473535 | -0.11343                    |
|                 | cg04527989 | <i>PTCD2</i>    | 5          | 0.005905 | 0.473535 | -0.11167                    |
|                 | cg06154597 | <i>MGC4618</i>  | 4          | 0.005905 | 0.473535 | -0.11065                    |
| Hypomethylated  | cg06812844 | <i>TRPM2</i>    | 21         | 0.009324 | 0.473535 | -0.115631                   |
|                 | cg01173186 | <i>VMP</i>      | 6          | 0.009324 | 0.473535 | -0.116092                   |
|                 | cg23265096 | <i>CTSZ</i>     | 20         | 0.009324 | 0.473535 | -0.122076                   |
|                 | cg20340242 | <i>IL1R2</i>    | 2          | 0.00373  | 0.473535 | -0.122983                   |
|                 | cg25882366 | <i>HOXB2</i>    | 17         | 0.005905 | 0.473535 | -0.127828                   |
|                 | cg12943082 | <i>CCL26</i>    | 7          | 0.005905 | 0.473535 | -0.138697                   |
|                 | cg21096966 | <i>BTBD5</i>    | 14         | 0.005905 | 0.473535 | -0.144355                   |
|                 | cg05556717 | <i>CCL26</i>    | 7          | 0.000622 | 0.473535 | -0.153207                   |

**Table S4.** Products and Known Functions of the Genes With Top Differentially Methylated Loci in the Comparisons I and II

| <b>Symbol</b> | <b>Gene ontology process</b>                                                                                                                                           | <b>Product</b>                                                                    |
|---------------|------------------------------------------------------------------------------------------------------------------------------------------------------------------------|-----------------------------------------------------------------------------------|
| <i>ENTPDI</i> | Cell adhesion; cell-cell signaling; blood coagulation; antimicrobial humoral response                                                                                  | Ectonucleoside Triphosphate Diphosphohydrolase 1                                  |
| <i>LGP1</i>   | Molecular function unknown                                                                                                                                             | LGP1 homolog                                                                      |
| <i>NPR2</i>   | cGMP biosynthesis; intracellular signaling cascade; regulation of blood pressure; protein amino acid phosphorylation; cell surface receptor linked signal transduction | Natriuretic peptide receptor B isoform a precursor                                |
| <i>SUSD1</i>  | Calcium ion binding                                                                                                                                                    | Sushi domain containing 1                                                         |
| <i>IL21R</i>  | Natural killer cell activation                                                                                                                                         | Interleukin 21 receptor precursor                                                 |
| <i>KCNA3</i>  | Potassium ion transport                                                                                                                                                | Potassium voltage-gated channel; shaker-related subfamily; member 3               |
| <i>ACOT11</i> | Fatty acid metabolism; response to temperature stimulus; intracellular signaling cascade                                                                               | Thioesterase; adipose associated isoform BFIT1                                    |
| <i>TFAP2E</i> | Regulation of transcription; DNA-dependent                                                                                                                             | Transcription factor AP-2 epsilon (activating enhancer binding protein 2 epsilon) |
| <i>RAB34</i>  | Protein transport; small GTPase mediated signal transduction                                                                                                           | RAB39                                                                             |
| <i>APBA2</i>  | Protein transport; nervous system development                                                                                                                          | Amyloid beta A4 precursor protein-binding; family A; member 2                     |
| <i>GIMAP5</i> | GTP binding; nucleotide binding                                                                                                                                        | GTPase; IMAP family member 5                                                      |
| <i>ABCC12</i> | Nucleotide binding; ATPase activity; coupled to transmembrane movement of substances                                                                                   | ATP-binding cassette; subfamily C; member 12 isoform e                            |
| <i>LUM</i>    | Visual perception; collagen fibril organization                                                                                                                        | Lumican precursor                                                                 |
| <i>CRTAM</i>  | Molecular function unknown                                                                                                                                             | Class-I MHC-restricted T cell associated molecule                                 |

| <b>Symbol</b>   | <b>Gene ontology process</b>                                                                                                                                                                                     | <b>Product</b>                                                |
|-----------------|------------------------------------------------------------------------------------------------------------------------------------------------------------------------------------------------------------------|---------------------------------------------------------------|
| <i>EDA2R</i>    | Cell differentiation; embryonic development; epidermis development; positive regulation of JNK cascade; activation of NF-kappa B transcription factor                                                            | X-linked ectodysplasin receptor                               |
| <i>CYSLTR2</i>  | Immune response; signal transduction; G-protein coupled receptor protein signaling pathway                                                                                                                       | Cysteinyl leukotriene receptor 2                              |
| <i>RCHY1</i>    | Protein ubiquitination                                                                                                                                                                                           | Ring finger and CHY zinc finger domain containing 1 isoform 1 |
| <i>RNF36</i>    | Protein ubiquitination                                                                                                                                                                                           | Ring finger protein 36 isoform b                              |
| <i>CXCL9</i>    | Chemotaxis; cell-cell signaling; signal transduction; signal transduction; inflammatory response; cellular defense response; G-protein coupled receptor protein signaling pathway                                | Small inducible cytokine B9 precursor                         |
| <i>LTA</i>      | Immune response; cell-cell signaling; signal transduction; induction of apoptosis                                                                                                                                | Lymphotoxin alpha precursor                                   |
| <i>TRY1</i>     | Proteolysis and peptidolysis                                                                                                                                                                                     | Trypsin X3                                                    |
| <i>CXCR3</i>    | Chemotaxis; cell adhesion; go_process: cell motility signal transduction; G-protein coupled receptor protein signaling pathway; elevation of cytosolic calcium ion concentration; antimicrobial humoral response | Chemokine (C-X-C motif) receptor 3                            |
| <i>GIMAP5</i>   | GTP binding; nucleotide binding                                                                                                                                                                                  | GTPase; IMAP family member 5                                  |
| <i>OFD1</i>     | Catalytic activity; biological process unknown                                                                                                                                                                   | Oral-facial-digital syndrome 1                                |
| <i>ASF1A</i>    | Loss of chromatin silencing                                                                                                                                                                                      | ASF1 anti-silencing function 1 homolog A                      |
| <i>CNR1</i>     | Behavior; signal transduction; G-protein signaling; coupled to cyclic nucleotide second messenger                                                                                                                | Central cannabinoid receptor isoform a                        |
| <i>TRHR</i>     | Signal transduction; G-protein coupled receptor protein signaling pathway                                                                                                                                        | Thyrotropin-releasing hormone receptor                        |
| <i>OR10H2</i>   | Signal transduction; sensory perception of smell; G-protein coupled receptor protein signaling pathway                                                                                                           | Olfactory receptor; family 10; subfamily H; member 2          |
| <i>FLJ46358</i> | Molecular function unknown                                                                                                                                                                                       | Hypothetical protein LOC400110                                |
| <i>ORM1</i>     | Acute-phase response; inflammatory response                                                                                                                                                                      | Orosomuroid 1 precursor                                       |



| <b>Symbol</b> | <b>Gene ontology process</b>                                                                                                                                                      | <b>Product</b>                                                                                |
|---------------|-----------------------------------------------------------------------------------------------------------------------------------------------------------------------------------|-----------------------------------------------------------------------------------------------|
| <i>SP140</i>  | Defense response; regulation of transcription;<br>DNA-dependent                                                                                                                   | SP140 nuclear body<br>protein isoform 1                                                       |
| <i>TRPM2</i>  | Sodium ion transport; calcium ion transport                                                                                                                                       | Transient receptor potential<br>cation channel; subfamily<br>M; member 2 isoform<br>SSF-TRPM2 |
| <i>VMP</i>    | Molecular function unknown                                                                                                                                                        | Vesicular membrane<br>protein p24                                                             |
| <i>CTSZ</i>   | Proteolysis                                                                                                                                                                       | cathepsin Z preproprotein                                                                     |
| <i>IL1R2</i>  | Blocking receptor activity; immune response                                                                                                                                       | Interleukin 1 receptor; type<br>II precursor                                                  |
| <i>HOXB2</i>  | Circulation; development; regulation of transcription;<br>DNA-dependent                                                                                                           | Homeo box B2                                                                                  |
| <i>CCL26</i>  | Chemotaxis; sensory perception; cell-cell signaling; signal<br>transduction; inflammatory response                                                                                | Chemokine (C-C motif)<br>ligand 26 precursor                                                  |
| <i>BTBD5</i>  | Protein binding                                                                                                                                                                   | BTB (POZ) domain<br>containing 5                                                              |
| <i>PLAT</i>   | Proteolysis; blood coagulation; protein modification                                                                                                                              | plasminogen activator;<br>tissue type isoform 1<br>preproprotein                              |
| <i>BTG3</i>   | Negative regulation of cell proliferation; regulation of<br>progression through cell cycle                                                                                        | B-cell translocation gene 3                                                                   |
| <i>JAK2</i>   | Cell motility; JAK-STAT cascade; mesoderm development;<br>intracellular signaling cascade; protein amino acid<br>phosphorylation; regulation of progression through cell<br>cycle | Janus kinase 2                                                                                |
| <i>ARID3A</i> | Regulation of transcription; DNA-dependent                                                                                                                                        | AT rich interactive domain<br>3A (BRIGHT- like) protei                                        |
| <i>CD9</i>    | Cell adhesion; cell motility; go_process: platelet activation;<br>paranodal junction assembly; fusion of sperm to egg<br>plasma membrane                                          | CD9 antigen                                                                                   |
| <i>GPR21</i>  | G-protein coupled receptor protein signaling pathway                                                                                                                              | G protein-coupled receptor<br>21                                                              |

| <b>Symbol</b>   | <b>Gene ontology process</b>                                                                                                                                                                                                                                                         | <b>Product</b>                                                     |
|-----------------|--------------------------------------------------------------------------------------------------------------------------------------------------------------------------------------------------------------------------------------------------------------------------------------|--------------------------------------------------------------------|
| <i>PITPNM2</i>  | Calcium ion binding; transport; metabolism                                                                                                                                                                                                                                           | Phosphatidylinositol transfer protein; membrane-associated 2       |
| <i>VNN3</i>     | Nitrogen compound metabolism                                                                                                                                                                                                                                                         | Vanin 3 isoform 2 precursor                                        |
| <i>NRG4</i>     | Growth factor activity                                                                                                                                                                                                                                                               | Neuregulin 4                                                       |
| <i>KRTCAP3</i>  | Unknown                                                                                                                                                                                                                                                                              | Keratinocyte associated protein 3                                  |
| <i>SEC31L2</i>  | Secretory pathway component Sec31B-1                                                                                                                                                                                                                                                 | Saccharomyces cerevisiae SEC31-like 2 isoform a                    |
| <i>PNPLA2</i>   | Adipose triglyceride lipase; lipid metabolism                                                                                                                                                                                                                                        | Patatin-like phospholipase domain containing 2                     |
| <i>PIP3-E</i>   | Oxygen transport; response to oxidative stress                                                                                                                                                                                                                                       | phosphoinositide-binding protein PIP3-E                            |
| <i>KLRG1</i>    | Inflammatory response; cellular defense response; cell surface receptor linked signal transduction                                                                                                                                                                                   | Killer cell lectin-like receptor subfamily G; member 1             |
| <i>FCGRT</i>    | MHC class I receptor activity; pregnancy; antigen presentation                                                                                                                                                                                                                       | Fc fragment of IgG; receptor; transporter; alpha                   |
| <i>CCDC19</i>   | Unknown biological process                                                                                                                                                                                                                                                           | Nasopharyngeal epithelium specific protein 1                       |
| <i>IL24</i>     | Cytokine activity; apoptosis; immune response                                                                                                                                                                                                                                        | Interleukin 24 isoform 2                                           |
| <i>MOBP</i>     | Nervous system development                                                                                                                                                                                                                                                           | Myelin-associated oligodendrocyte basic protein isoform c          |
| <i>PTPRC</i>    | Regulation of cell cycle; B cell receptor signaling; amino acid dephosphorylation; positive regulation of T cell proliferation; negative regulation of protein kinase activity; release of sequestered calcium ion into cytosol; negative regulation of T cell mediated cytotoxicity | Protein tyrosine phosphatase; receptor type; C isoform 1 precursor |
| <i>SLC25A26</i> | Transport; binding                                                                                                                                                                                                                                                                   | Solute carrier family 25; member 26 isoform b                      |
| <i>UNQ9356</i>  | Receptor activity                                                                                                                                                                                                                                                                    | IVFI9356                                                           |

| <b>Symbol</b>    | <b>Gene ontology process</b>                                                                                                                                                        | <b>Product</b>                                              |
|------------------|-------------------------------------------------------------------------------------------------------------------------------------------------------------------------------------|-------------------------------------------------------------|
| <i>AHR</i>       | Apoptosis; cell cycle; response to stress; response to xenobiotic stimulus; DNA-dependent; transcription from RNA polymerase II promoter                                            | Aryl hydrocarbon receptor                                   |
| <i>FASLG</i>     | Tumor necrosis factor receptor binding; apoptosis; immune response; cell-cell signaling; induction of apoptosis; positive regulation of I- $\kappa$ B kinase/NF- $\kappa$ B cascade | Fas ligand                                                  |
| <i>UBASH3A</i>   | Catalytic activity; metabolism                                                                                                                                                      | Ubiquitin associated and SH3 domain containing; A long form |
| <i>ITGB6</i>     | Development; cell adhesion; cell-matrix adhesion; integrin-mediated signaling pathway                                                                                               | Integrin; beta 6                                            |
| <i>RGS13</i>     | Negative regulation of signal transduction                                                                                                                                          | Regulator of G-protein signaling 13                         |
| <i>PIK3C2A</i>   | Intracellular signaling cascade; phosphatidylinositol biosynthesis                                                                                                                  | Phosphoinositide-3-kinase; class 2; alpha polypeptide       |
| <i>CYBB</i>      | Ion transport; electron transport; inflammatory response; antimicrobial humoral response (sensu Vertebrata)                                                                         | Cytochrome b-245; beta polypeptide                          |
| <i>KSR1</i>      | Intracellular signaling cascade; protein amino acid phosphorylation; Ras protein signal transduction                                                                                | Kinase suppressor of ras                                    |
| <i>KRTAP19-6</i> | Unknown biological process                                                                                                                                                          | Keratin associated protein 19-6                             |
| <i>GPR87</i>     | G-protein coupled receptor protein signaling pathway                                                                                                                                | G protein-coupled receptor 87                               |
| <i>RBM10</i>     | RNA binding; zinc ion binding; nucleotide binding; nucleic acid binding                                                                                                             | RNA binding motif protein 10 isoform 1                      |
| <i>CHFR</i>      | Mitosis; cell cycle; cell division; mitotic checkpoint; protein ubiquitination                                                                                                      | Checkpoint with FHA and Ring Finger                         |
| <i>KERA</i>      | Visual perception; eye development                                                                                                                                                  | Keratocan                                                   |
| <i>EGFL11</i>    | Calcium ion binding                                                                                                                                                                 | EGF-like-domain; multiple 11                                |
| <i>POT1</i>      | Protein amino acid dephosphorylation                                                                                                                                                | Protein phosphatase 1M (PP2C domain containing)             |

| <b>Symbol</b>  | <b>Gene ontology process</b>                                                                                                                                                                                                             | <b>Product</b>                                                   |
|----------------|------------------------------------------------------------------------------------------------------------------------------------------------------------------------------------------------------------------------------------------|------------------------------------------------------------------|
| <i>LCK</i>     | Caspase activation; zinc ion homeostasis; induction of apoptosis; protein amino acid phosphorylation; Ras protein signal transduction; release of sequestered calcium ion into cytosol; positive regulation of T cell receptor signaling | Lymphocyte-specific protein tyrosine kinase                      |
| <i>SIAE</i>    | Hydrolase activity; serine esterase activity; sialate O-acetylerase activity                                                                                                                                                             | Cytosolic sialic acid 9-O-acetylerase homolog                    |
| <i>NLN</i>     | Zinc ion binding; hydrolase activity; metalloendopeptidase activity; proteolysis                                                                                                                                                         | Neurolysin                                                       |
| <i>KCNH5</i>   | Cation transport; potassium ion transport; regulation of transcription; DNA-dependent; two-component signal transduction system (phosphorelay)                                                                                           | Potassium voltage-gated channel; subfamily H; member 5 isoform 1 |
| <i>ORIG1</i>   | Signal transduction; sensory perception of smell; G-protein coupled receptor protein signaling pathway                                                                                                                                   | Olfactory receptor; family 1; subfamily G; member 1              |
| <i>PTCD2</i>   | Binding                                                                                                                                                                                                                                  | Pentatricopeptide repeat domain 2                                |
| <i>MGC4618</i> | Unknown molecular function                                                                                                                                                                                                               | hypothetical protein<br>LOC84286                                 |

**Table S5.** Top 10 Pathways Enriched in the Comparison Between Patients With OSA With and Without Hypertension (Comparison II)

| Pathway maps                                                               | Number in data/total | P value    | q value    | Differentially methylated loci involved in the pathway                                                                        |
|----------------------------------------------------------------------------|----------------------|------------|------------|-------------------------------------------------------------------------------------------------------------------------------|
| Apoptosis and survival_Anti-apoptotic action of membrane-bound <i>ESR1</i> | 4/38                 | 9.824 E-04 | 1.138 E-01 | <i>JNK(MAPK8-10)</i> , <i>L-type Ca(II) channel</i> , <i>alpha 1C subunit</i> , <i>Bcl-2</i> , <i>PI3K reg class IA (p85)</i> |
| Transcription_ <i>P53</i> signaling pathway                                | 4/39                 | 1.085 E-03 | 1.138 E-01 | <i>JNK(MAPK8-10)</i> , <i>FHL2</i> , <i>Rb protein</i> , <i>Bcl-2</i>                                                         |
| Retinol metabolism / Rodent version                                        | 5/68                 | 1.186 E-03 | 1.138 E-01 | <i>DHA6</i> , <i>CYP2A6</i> , <i>DGAT1</i> , <i>ALIA1</i> , <i>ALDH2</i>                                                      |
| Immune response_ <i>HMGB1</i> release from the cell                        | 4/41                 | 1.312 E-03 | 1.138 E-01 | <i>JNK(MAPK8-10)</i> , <i>PARP-1</i> , <i>PI3K reg class IA (p85)</i> , <i>PI3K reg class IA</i>                              |
| Retinol metabolism                                                         | 5/72                 | 1.534 E-03 | 1.138 E-01 | <i>DHA6</i> , <i>CYP2A6</i> , <i>DGAT1</i> , <i>ALIA1</i> , <i>ALDH2</i>                                                      |
| Development_ <i>Notch</i> Signaling Pathway                                | 4/43                 | 1.570 E-03 | 1.138 E-01 | <i>SKIP (Ski-interacting protein)</i> , <i>Furin</i> , <i>Histone H3</i> , <i>ADAM17</i>                                      |
| Development_ Melanocyte development and pigmentation                       | 4/49                 | 2.555 E-03 | 1.588 E-01 | <i>SOX10</i> , <i>Frizzled</i> , <i>PI3K reg class IA</i> , <i>PKA-reg (cAMP-dependent)</i>                                   |
| <i>G-protein</i> signaling_ Proinsulin C-peptide signaling                 | 4/52                 | 3.178 E-03 | 1.646 E-01 | <i>PI3K reg class IA (p85-alpha)</i> , <i>Bcl-2</i> , <i>PI3K reg class IA (p85)</i> , <i>PI3K reg class IA</i>               |
| Immune response_ <i>HMGB1/RAGE</i> signaling pathway                       | 4/53                 | 3.406 E-03 | 1.646 E-01 | <i>JNK(MAPK8-10)</i> , <i>PI3K reg class IA (p85-alpha)</i> , <i>PLAT (TPA)</i> , <i>PI3K reg class IA (p85)</i>              |
| Development_ <i>Gastrin</i> in cell growth and proliferation               | 4/62                 | 5.988 E-03 | 1.978 E-01 | <i>JNK(MAPK8-10)</i> , <i>PI3K reg class IA (p85-alpha)</i> , <i>E-cadherin</i> , <i>PI3K reg class IA (p85)</i>              |
